# Supplementary material
Source: publisher figshare collection journal article supplement (https://frontiersin.figshare.com/ndownloader/files/13076441)
Supplement: Supplementary file [file 13076441]

## Supplementary Material

### Clinical heterogeneities among *LRRK2* variants in Parkinson's disease: a meta-analysis

Li Shu<sup>2†</sup>, Yuan Zhang<sup>2†</sup>, Hongxu Pan<sup>2</sup>, Qian Xu<sup>2,3,4</sup>, Jifeng Guo<sup>2,3,4,6,7,8</sup>, Beisha Tang<sup>1,2,3,4,5,6,7,8</sup>, Qiying Sun<sup>1,3,4\*</sup>

† These authors have contributed equally to this work and are co-first authors.

\* Correspondence: Qiying Sun [sunqiying2015@163.com](mailto:sunqiying2015@163.com)

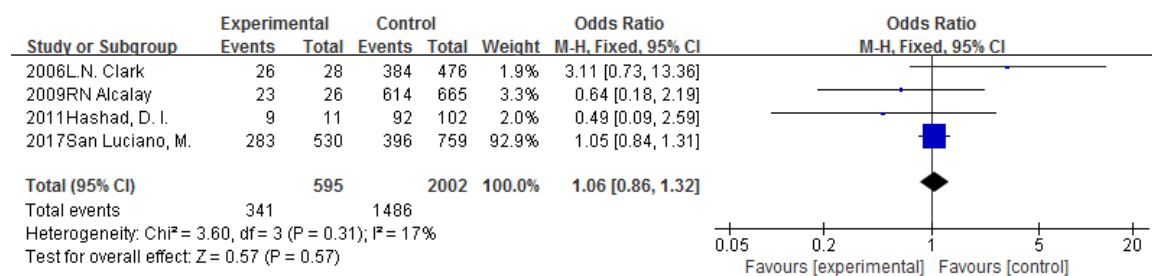

#### 1.1 Asymmetrical onset of G2019S

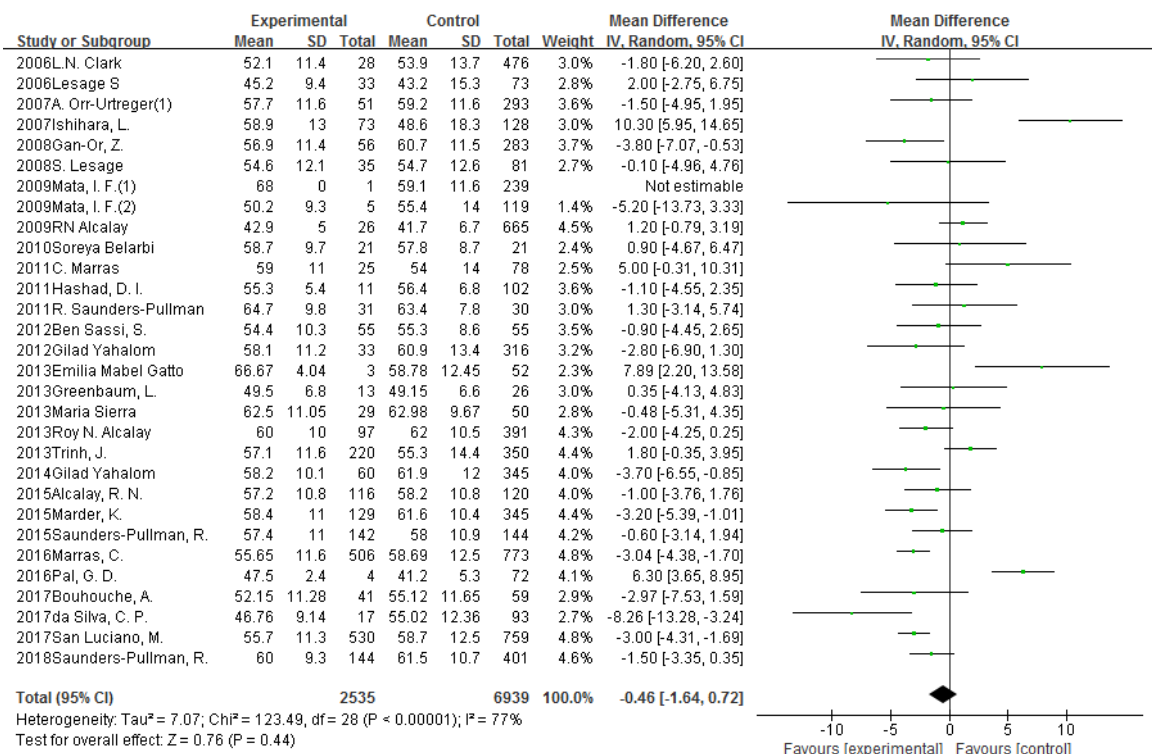

#### 1.2 Age at onset of G2019S

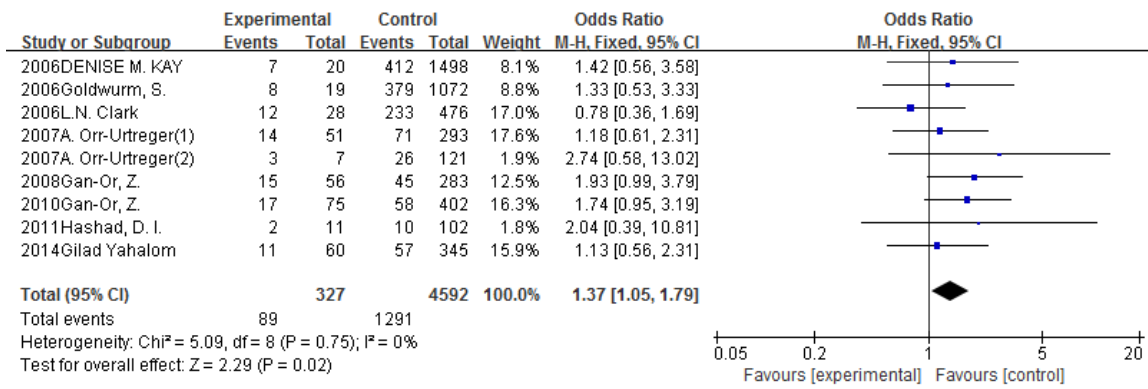

### 1.3 EOPD of G2019S

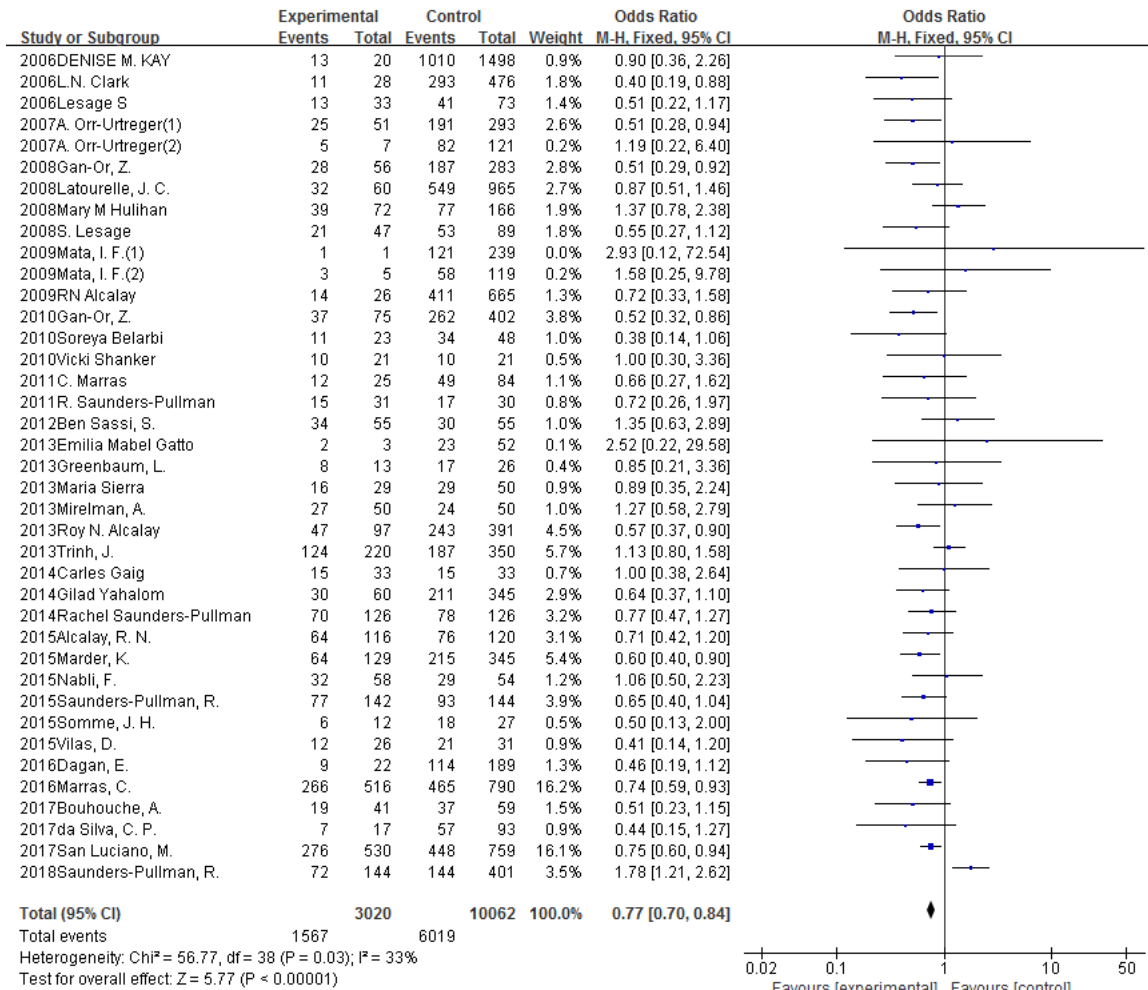

### 1.4 Gender-male of G2019S

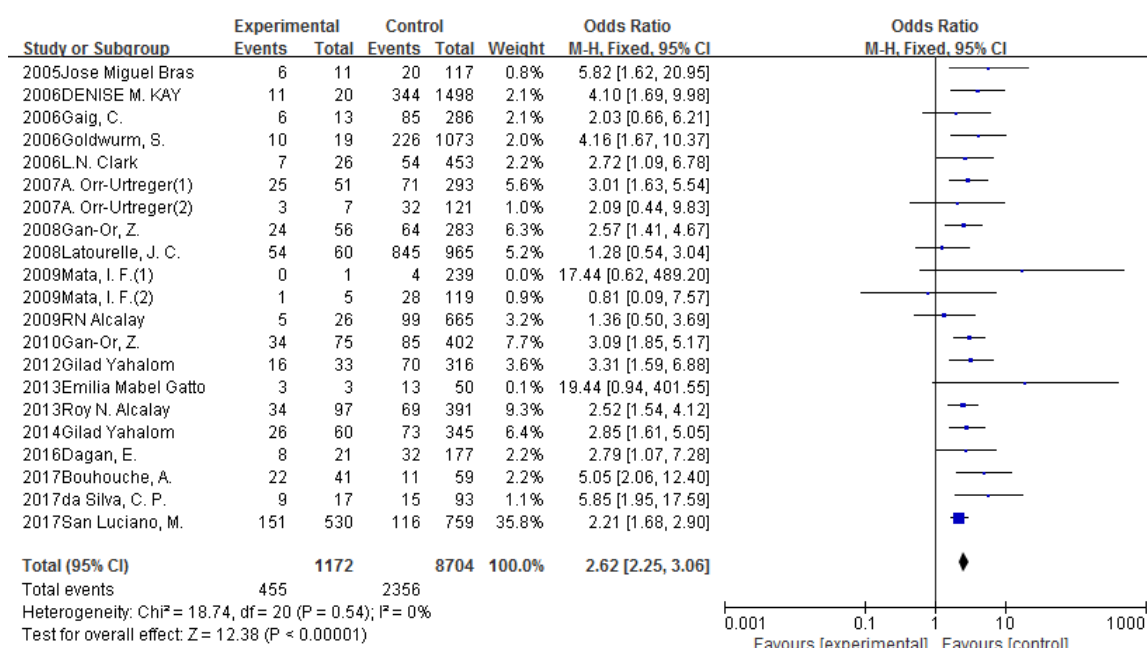

## 1.5 Family history of G2019S

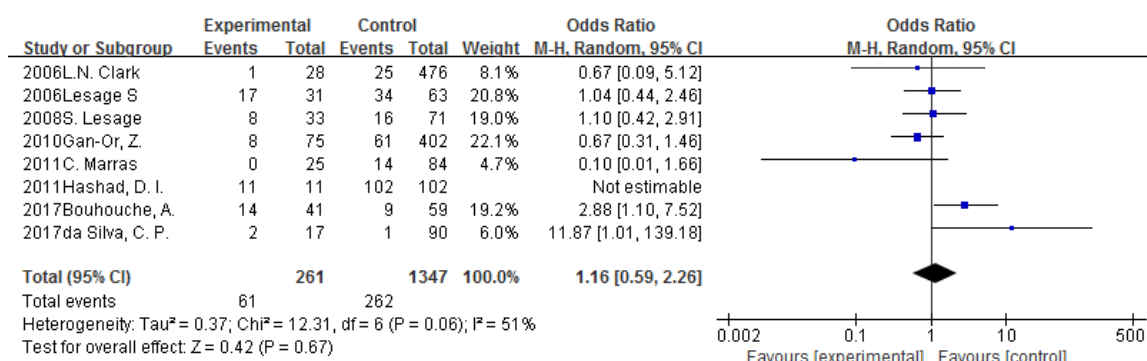

## 1.6 FS-bradykinesia of G2019S

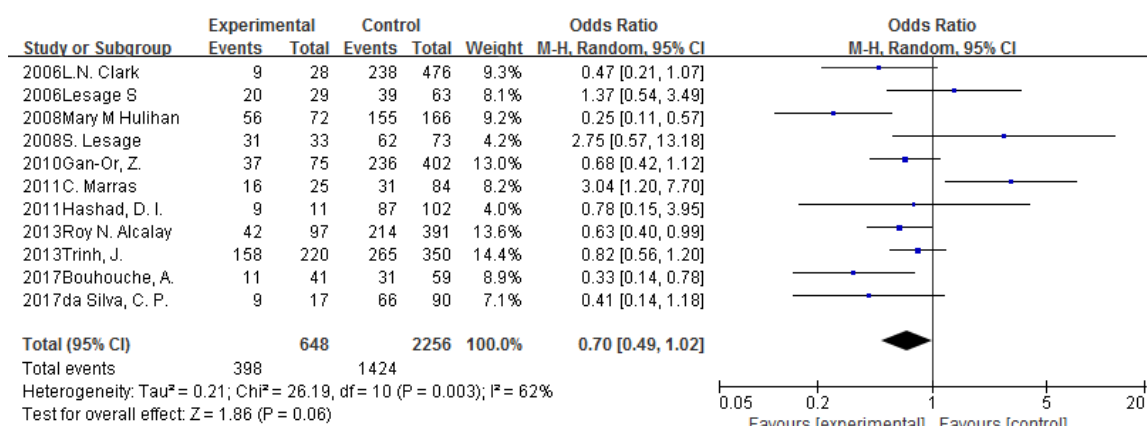

## 1.7 FS-resting tremor of G2019S

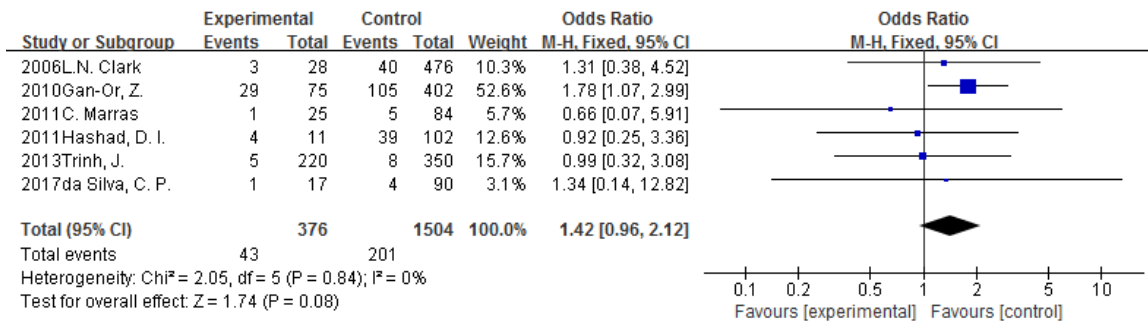

### 1.8 FS-rigidity of G2019S

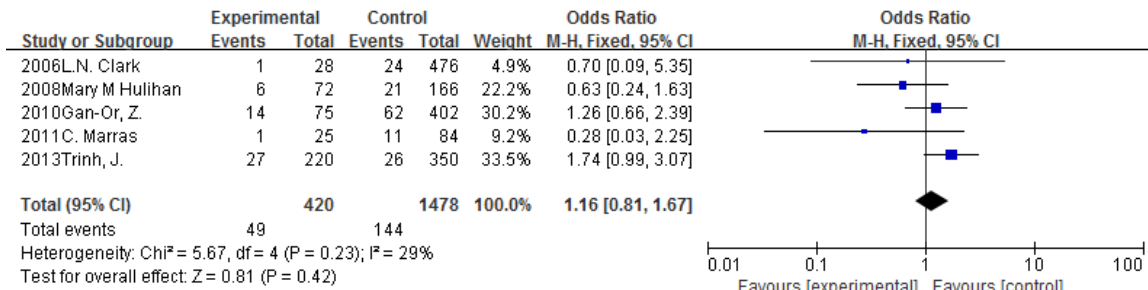

### 1.9 FS-Postural instability or Gait difficulty of G2019S

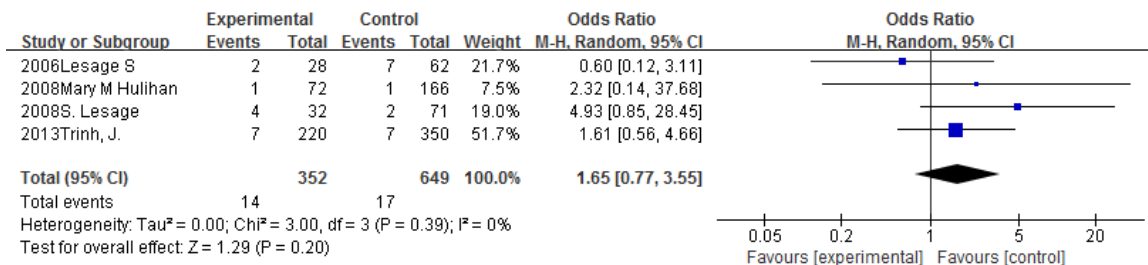

### 1.10 FS-Dystonia of G2019S

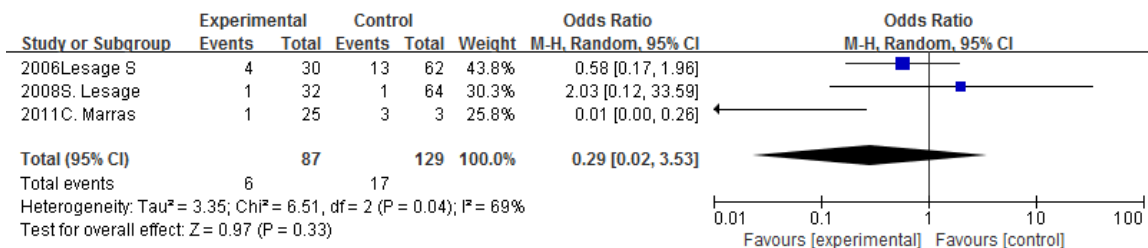

### 1.11 FS-Micrographia of G2019S

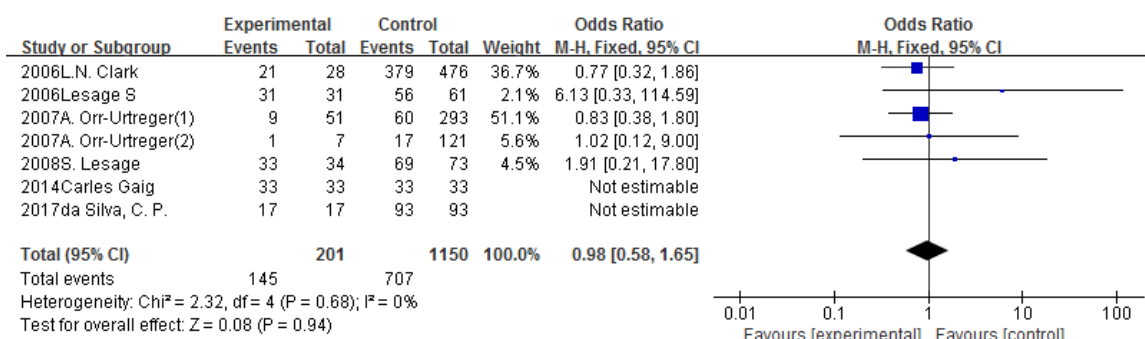

## 1.12 Bradykinesia of G2019S

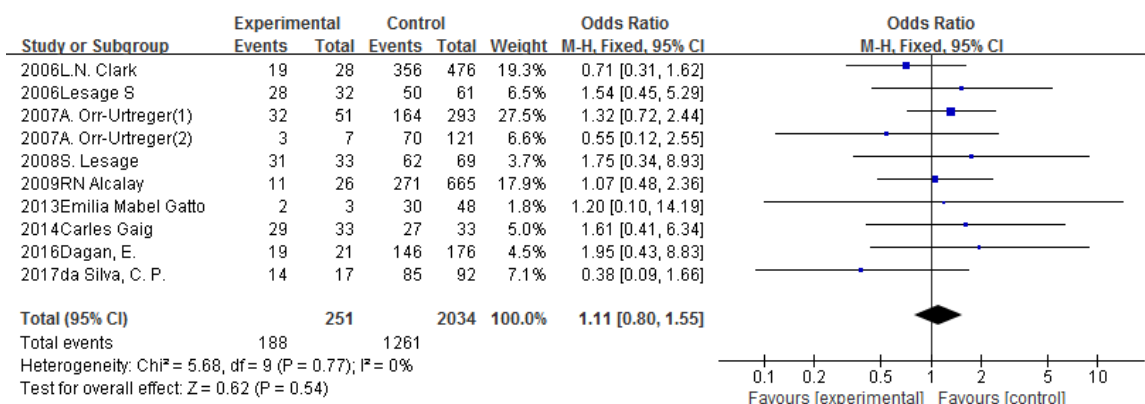

## 1.13 Resting tremor of G2019S

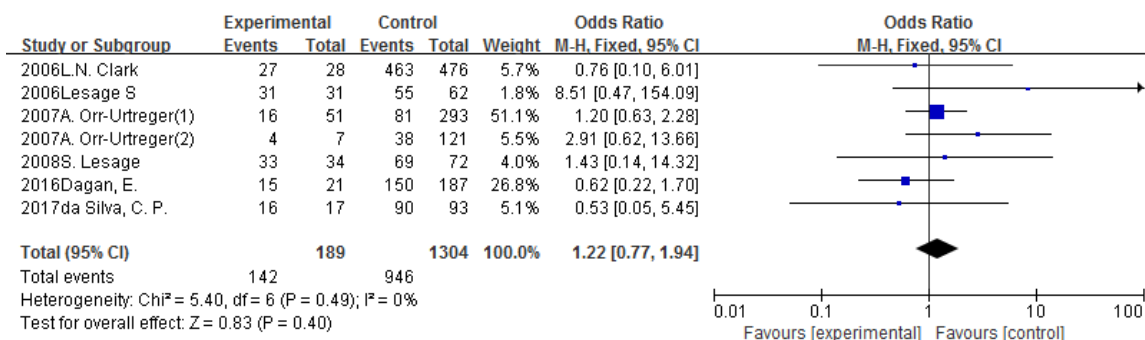

## 1.14 Rigidity of G2019S

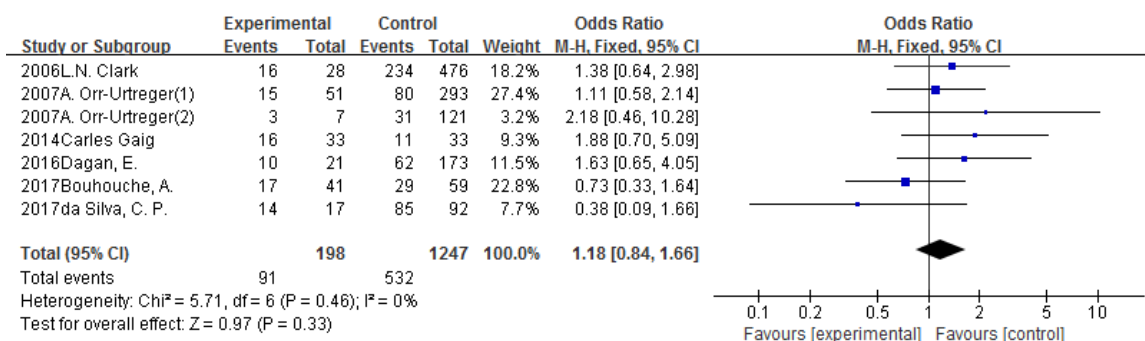

## 1.15 Postural instability or Gait difficulty of G2019S

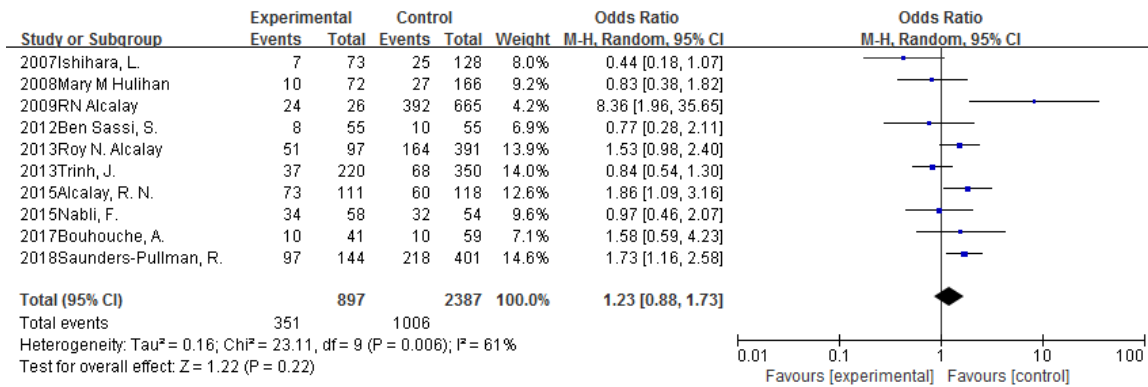

### 1.16 T-Akinetic-rigid/PIGD of G2019S

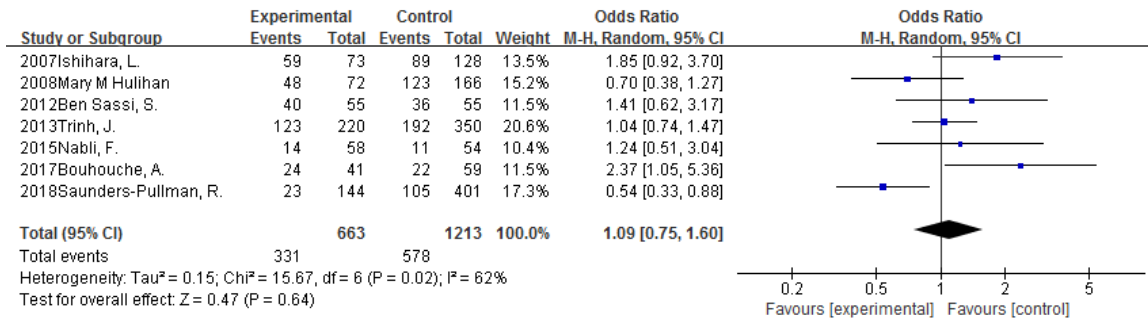

### 1.17 T-Mixed/Intermediate of G2019S

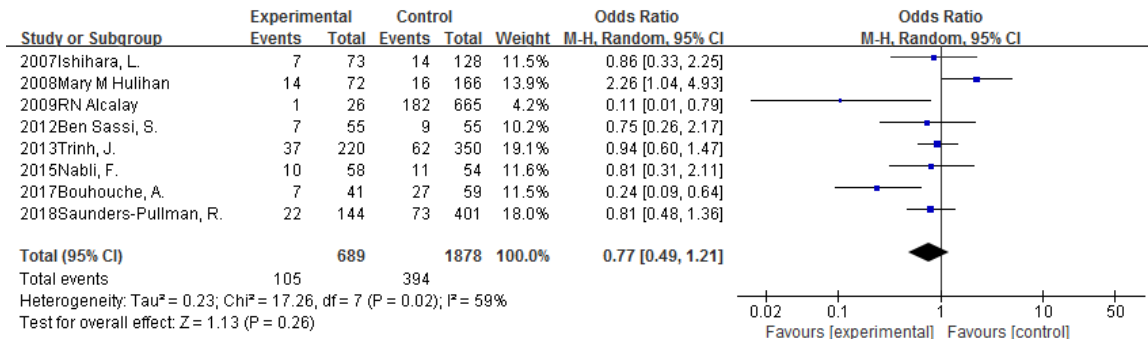

### 1.18 T-Tremor-dominant of G2019S

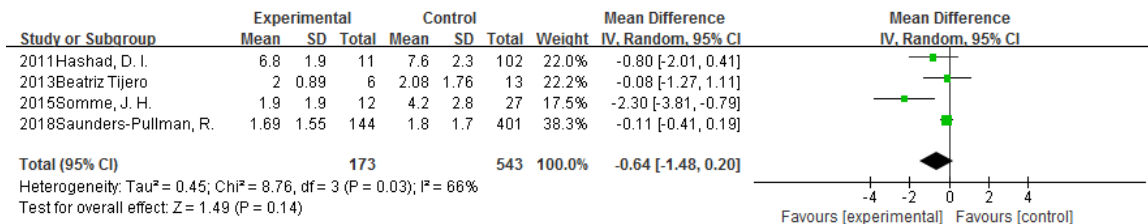

### 1.19 UPDRS I of G2019S

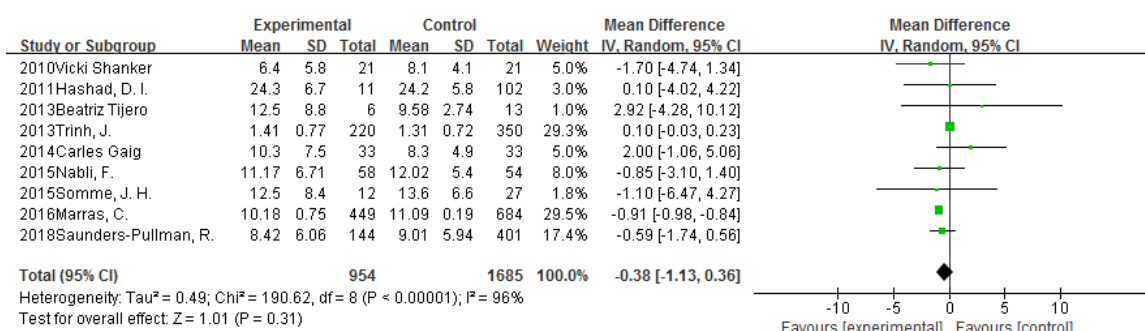

## 1.20 UPDRS II of G2019S

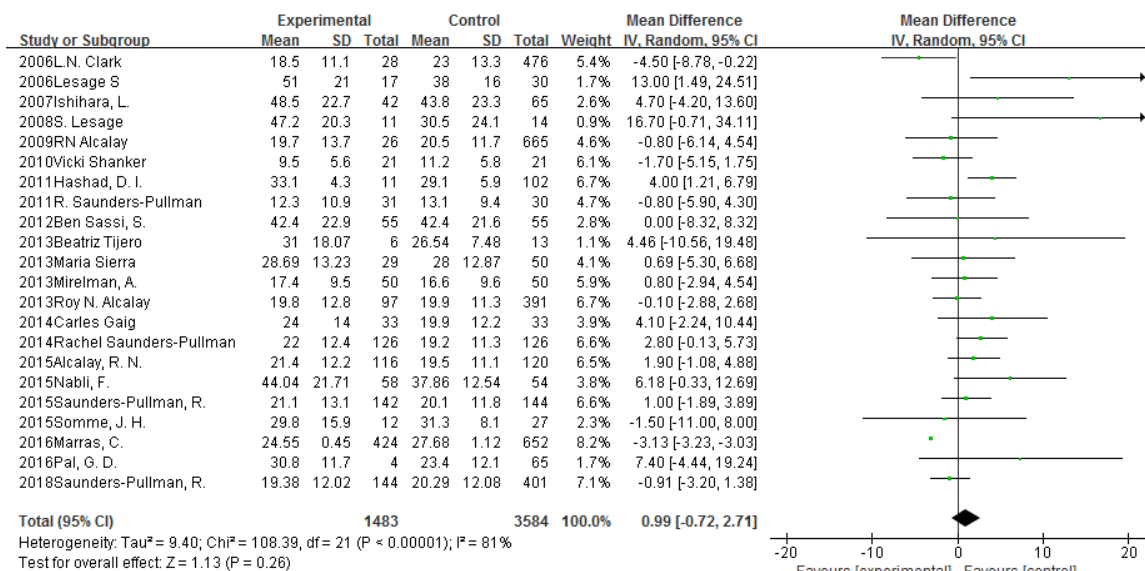

## 1.21 UPDRSIII of G2019S

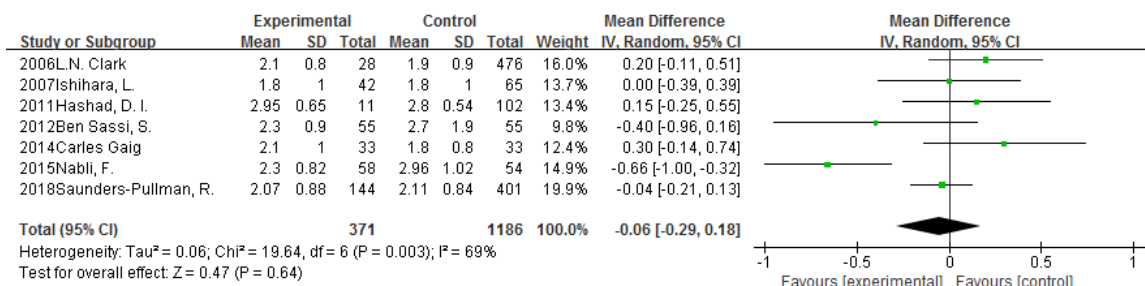

## 1.22 H-Y of G2019S

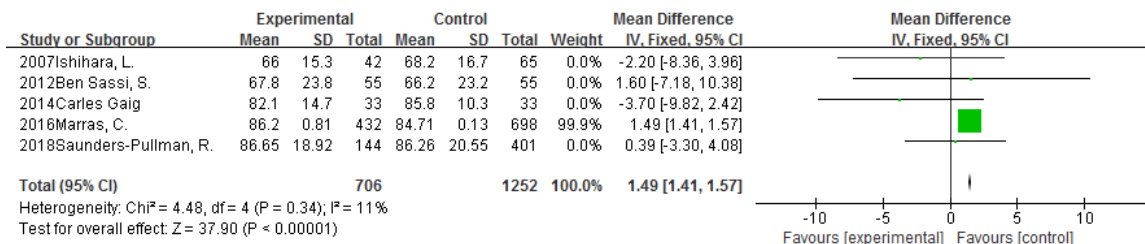

## 1.23 Schwab & England of G2019S



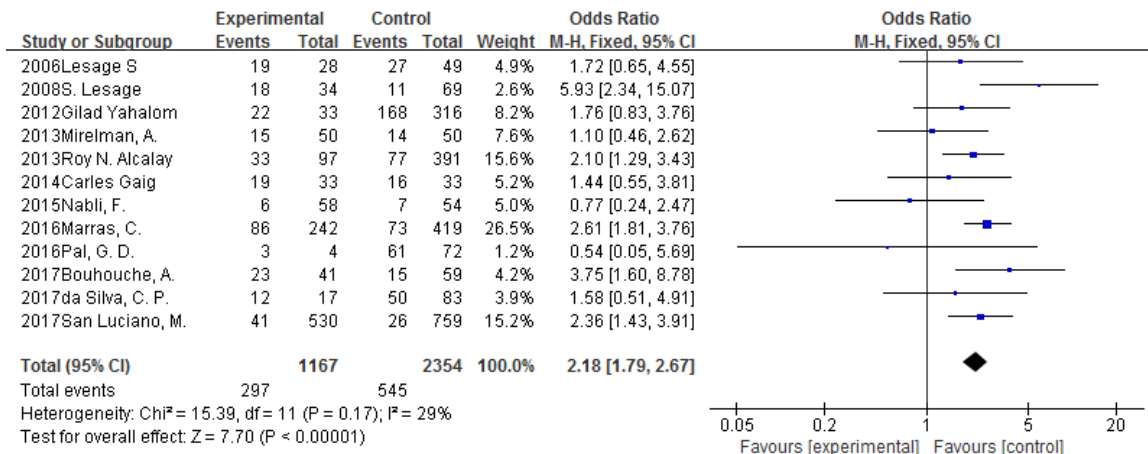

## 1.24 Dyskinesia of G2019S

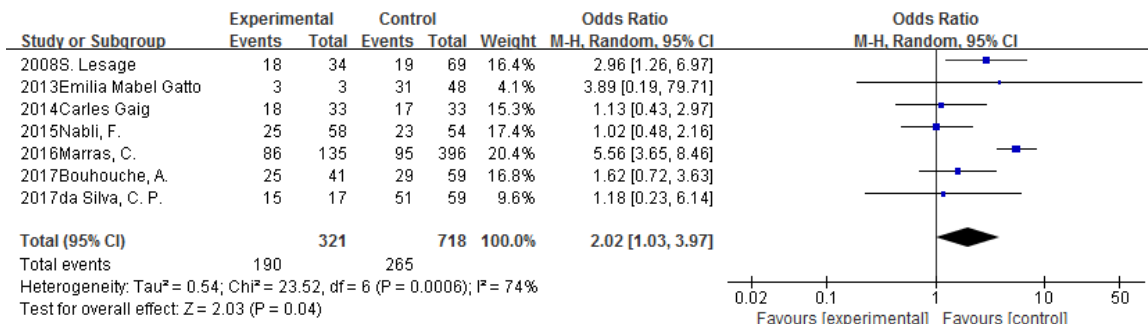

## 1.25 Motor fluctuations of G2019S

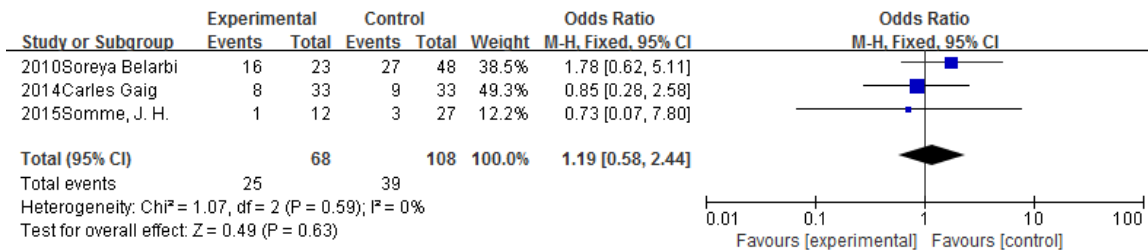

## 1.26 Anxiety of G2019S

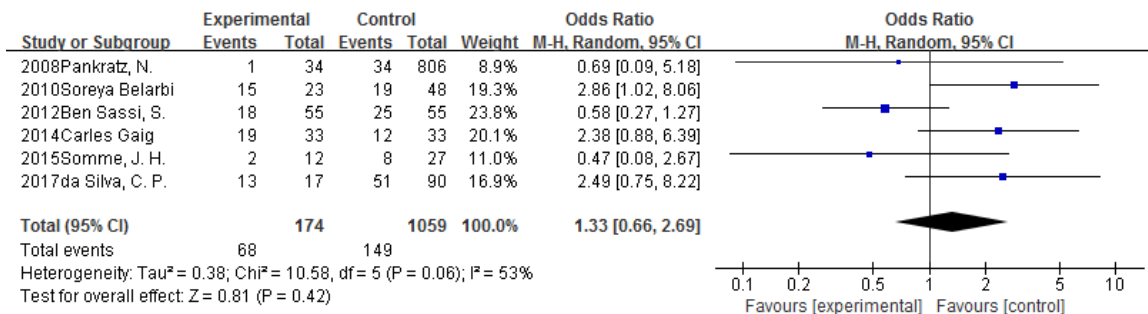

## 1.27 Depression of G2019S



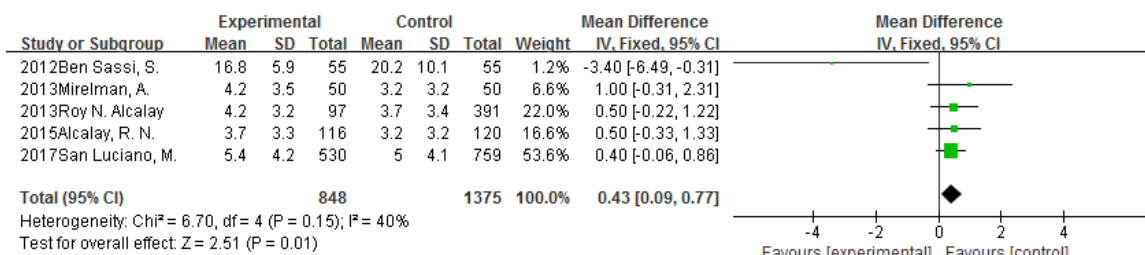

## 1.28 GDS15 of G2019S

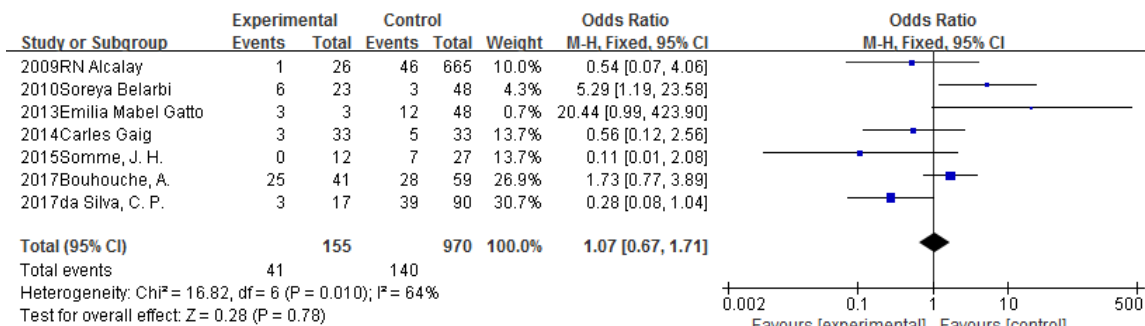

## 1.29 Hallucination of G2019S

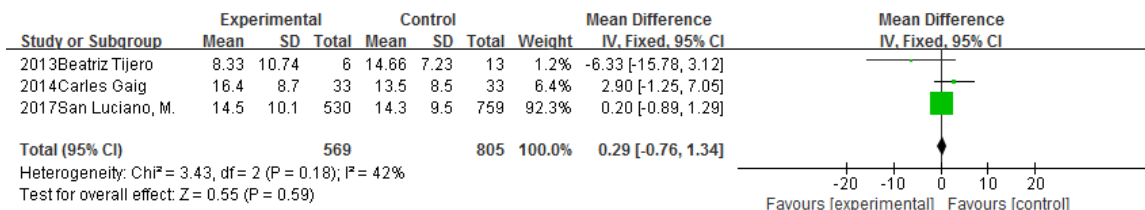

## 1.30 SCOPA-AUT of G2019S

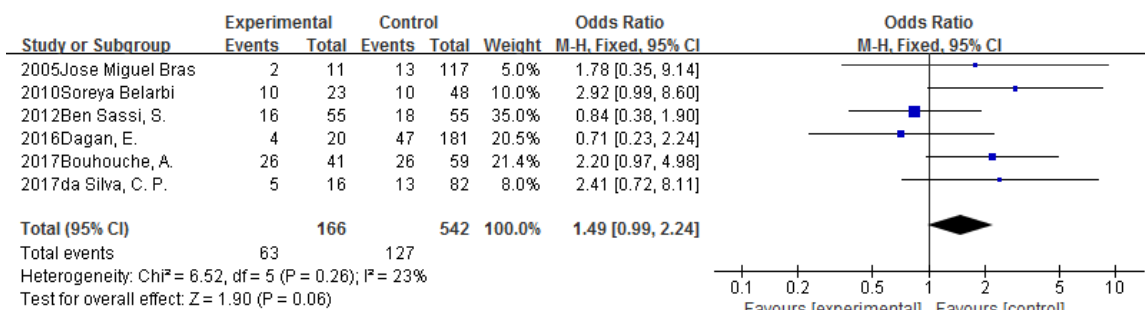

## 1.31 Cognitive impairments of G2019S

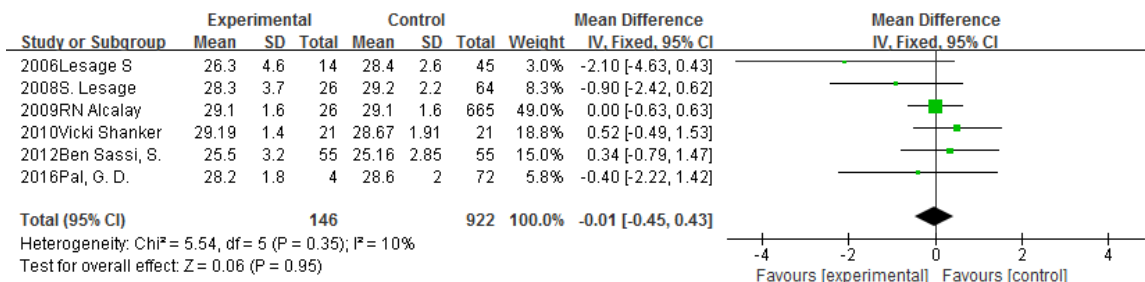

## 1.32 MMSE of G2019S

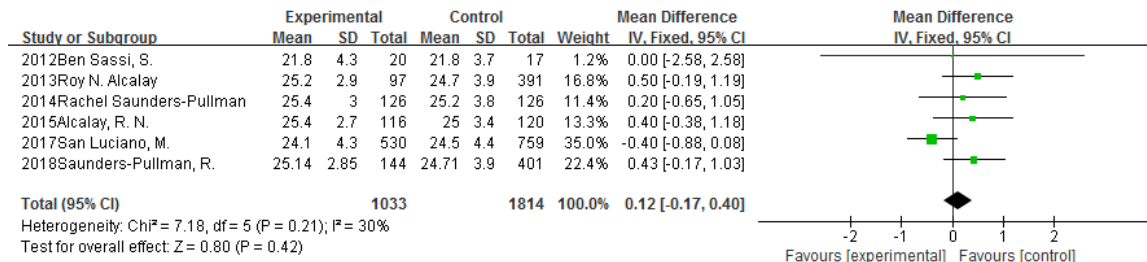

## 1.33 MoCA of G2019S

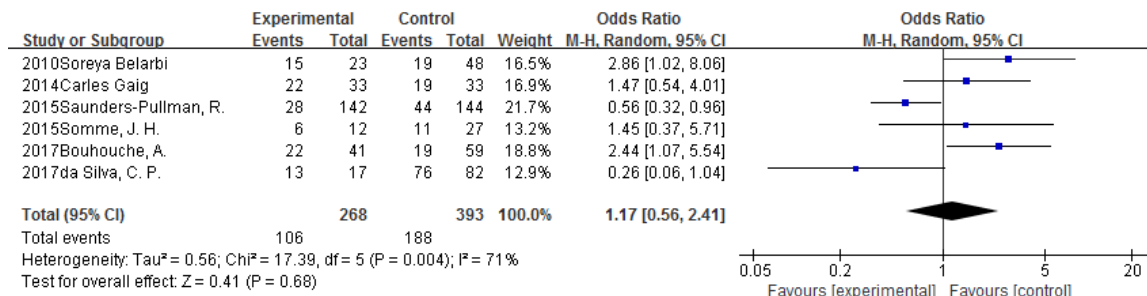

## 1.34 Sleep disturbances of G2019S

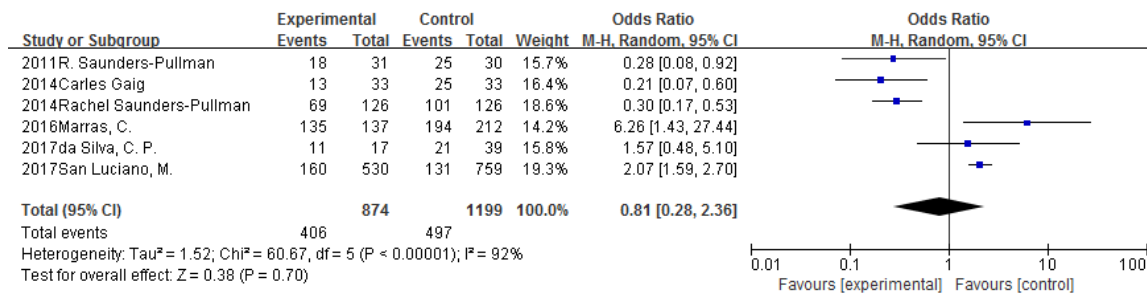

## 1.35 Olfactory disturbances of G2019S

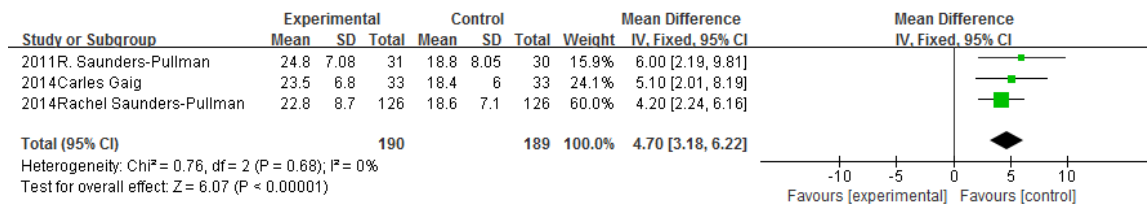

## 1.36 UPSIT scores of G2019S

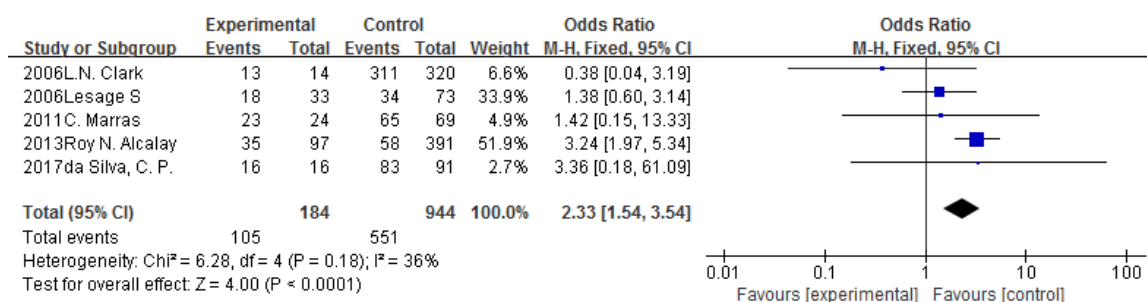

### 1.37 Good response to l-dopa of G2019S

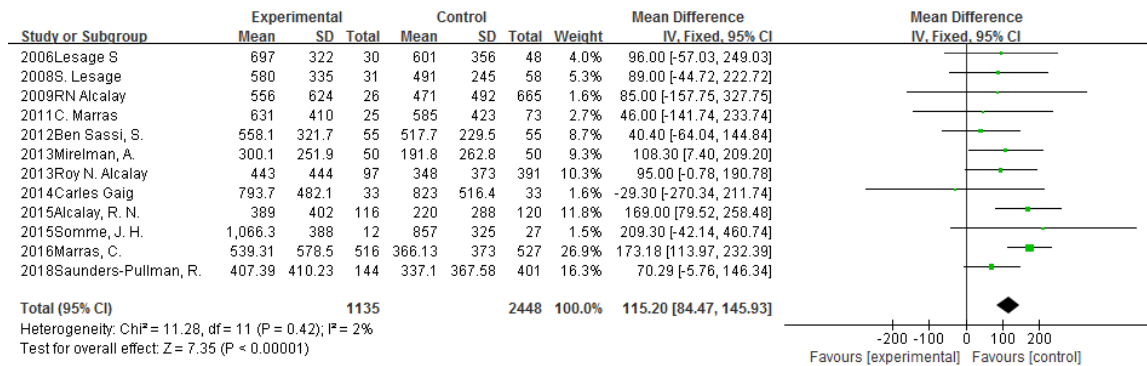

### 1.38 LEDD of G2019S

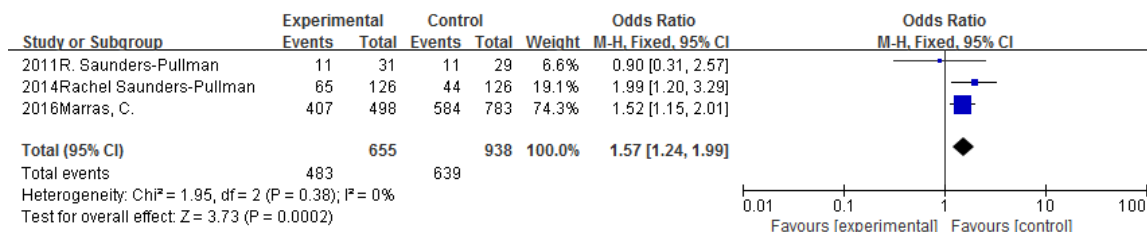

### 1.39 Smoke of G2019S

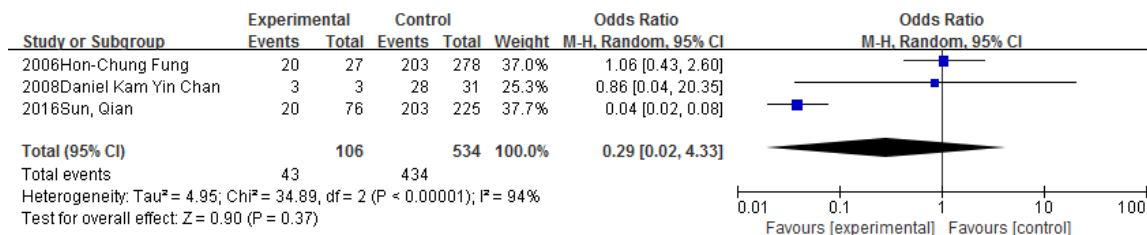

### 1.40 Asymmetrical onset of G2385R

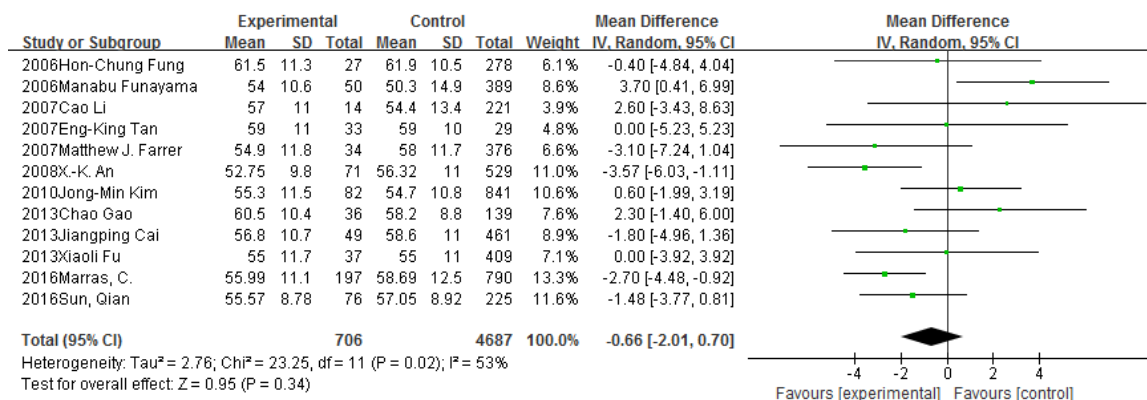

### 1.41 Age at onset of G2385R

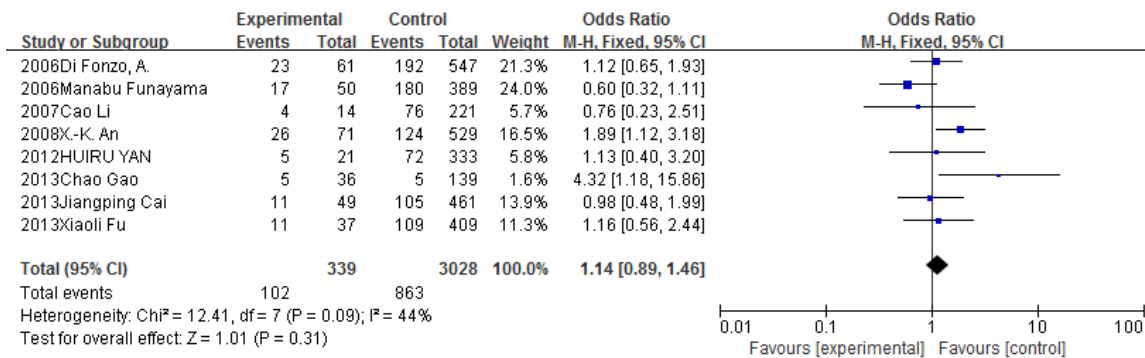

#### 1.42 EOPD of G2385R

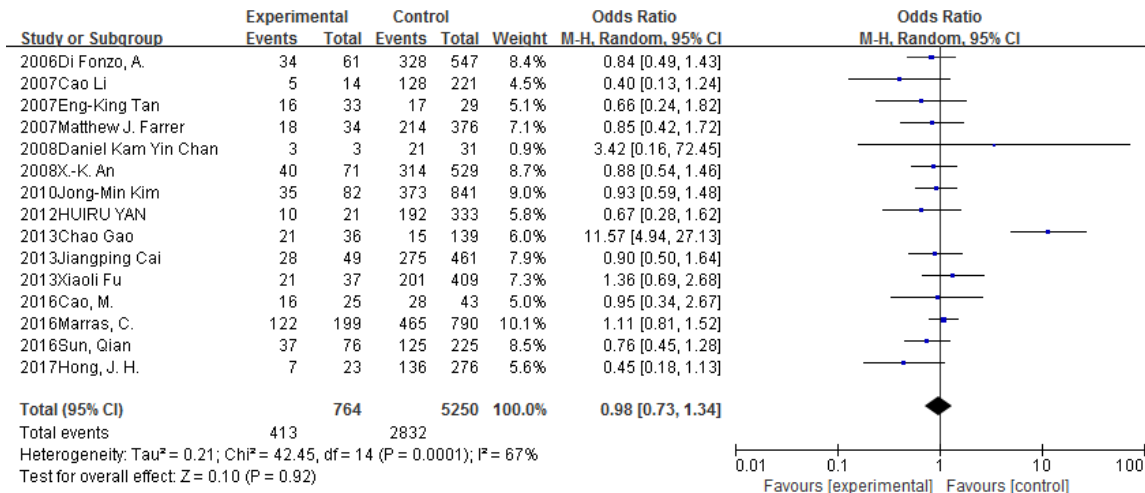

#### 1.43 Gender-male of G2385R

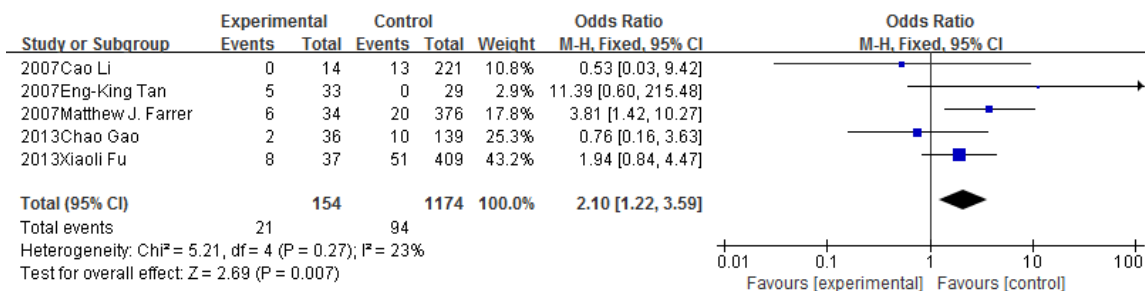

#### 1.44 Family history of G2385R

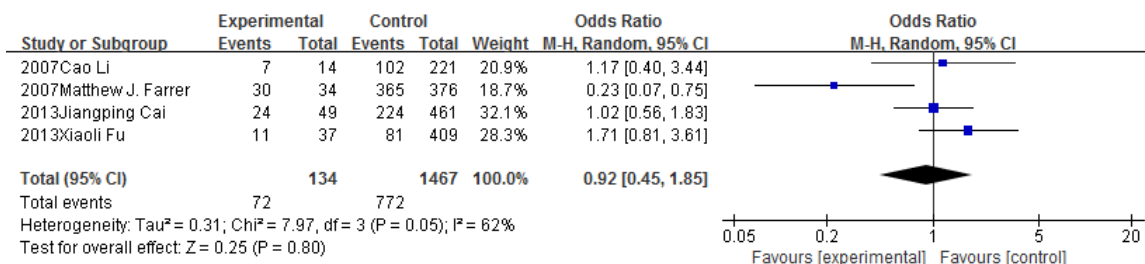

#### 1.45 FS-Bradykinesia of G2385R

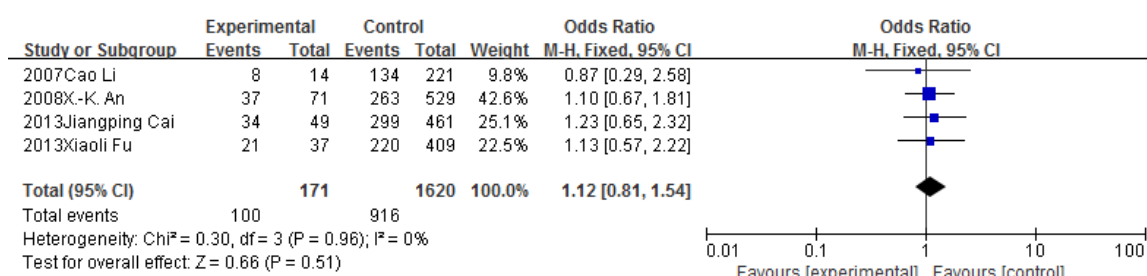

#### 1.46 FS-Resting tremor of G2385R

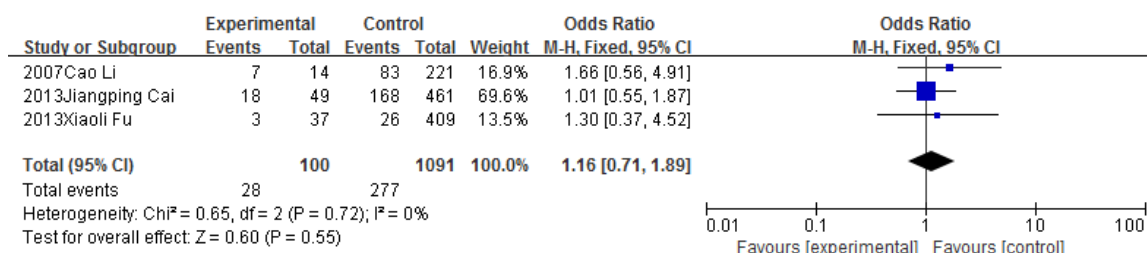

#### 1.47 FS-Rigidity of G2385R

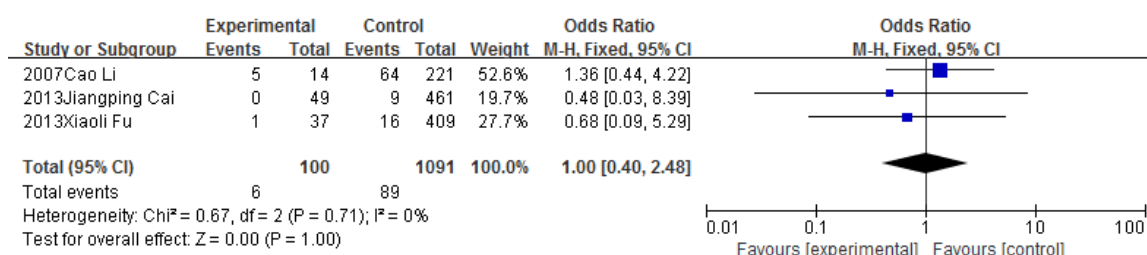

#### 1.48 FS-Postural instability or Gait difficulty of G2385R

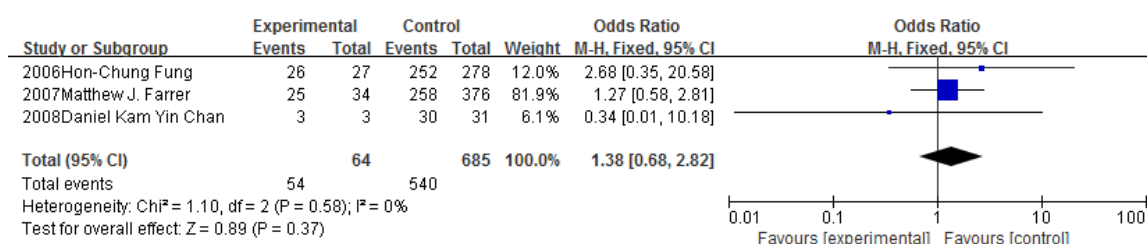

#### 1.49 Resting tremor of G2385R

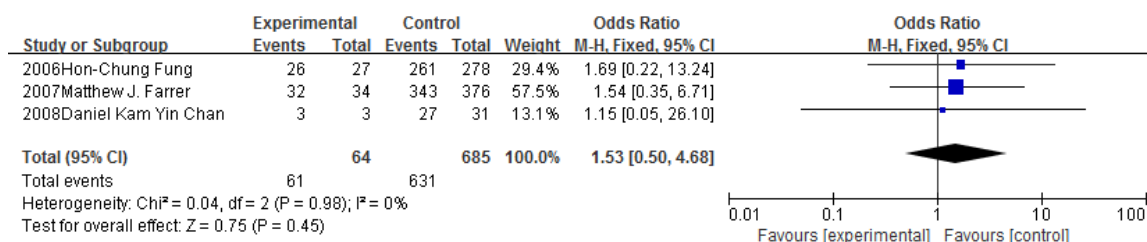

#### 1.50 Rigidity of G2385R

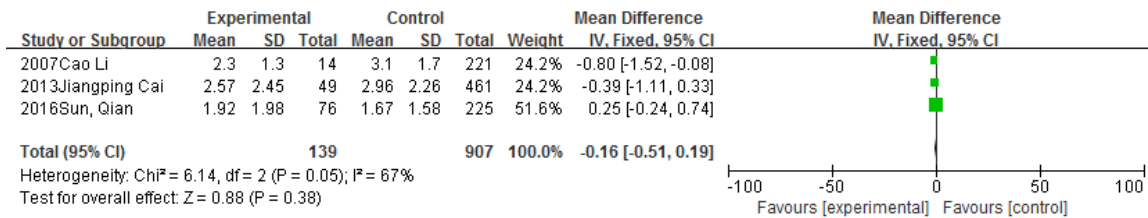

### 1.51 UPDRS I of G2385R

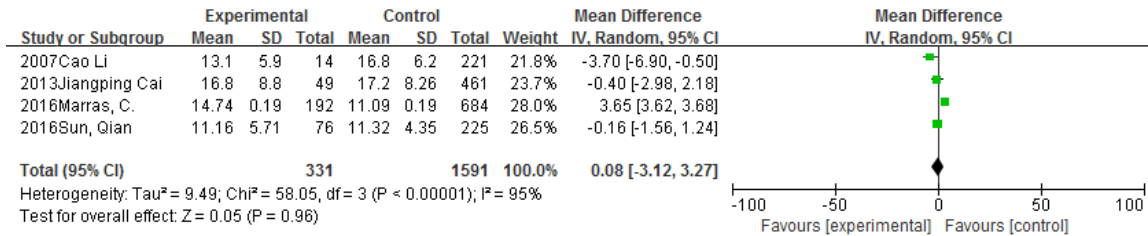

### 1.52 UPDRS II of G2385R

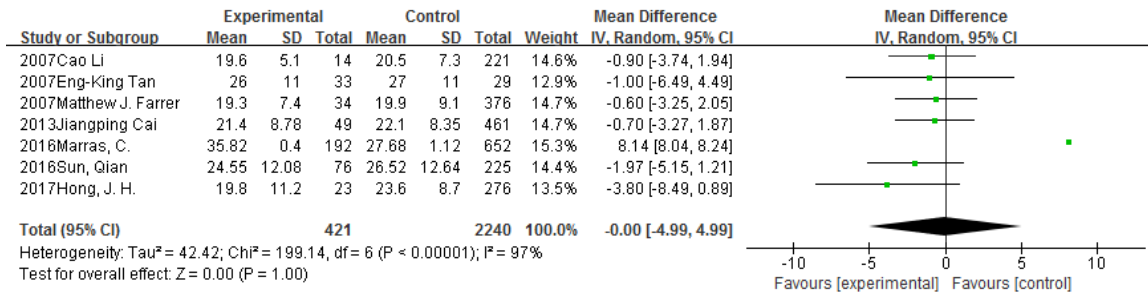

### 1.53 UPDRSIII of G2385R

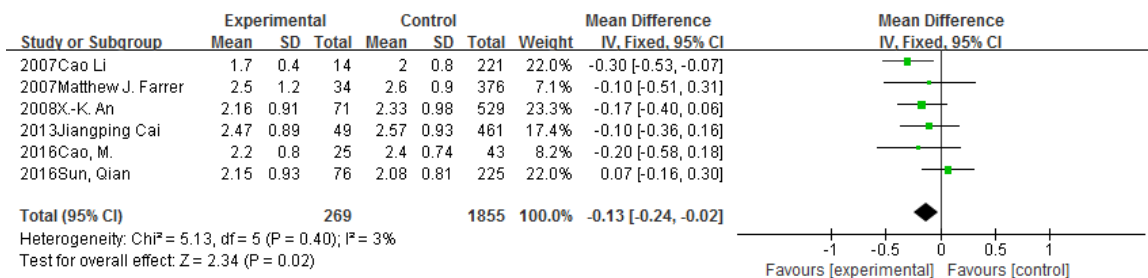

### 1.54 H-Y of G2385R

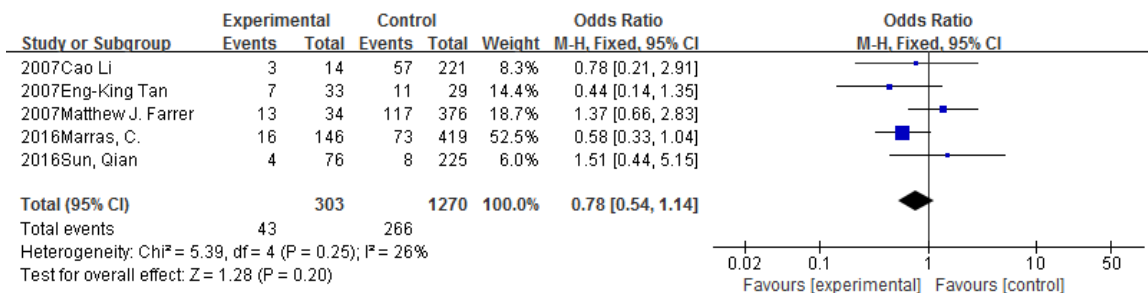

### 1.55 Dyskinesia of G2385R

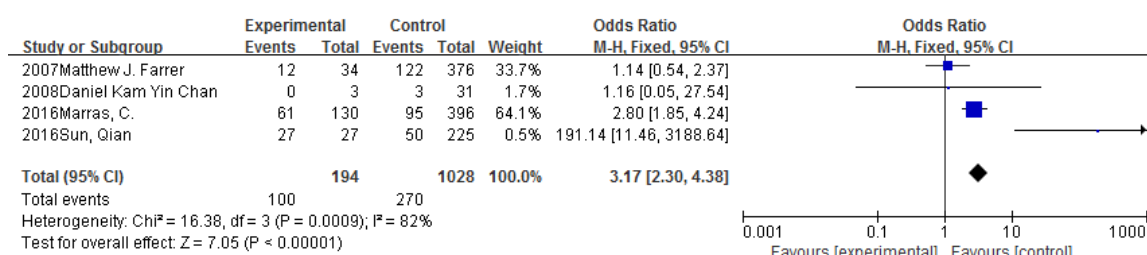

## 1.56 Motor fluctuations of G2385R

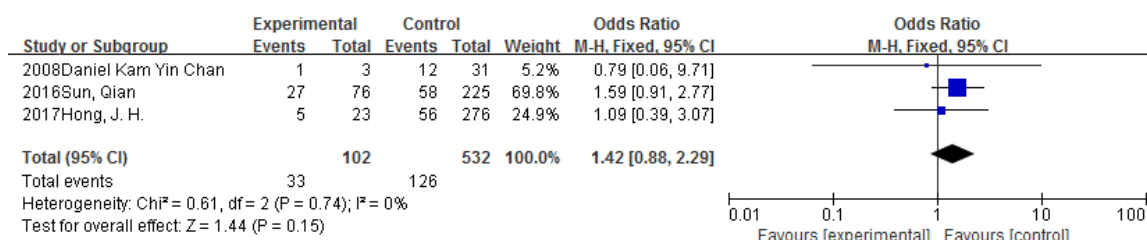

## 1.57 Depression of G2385R

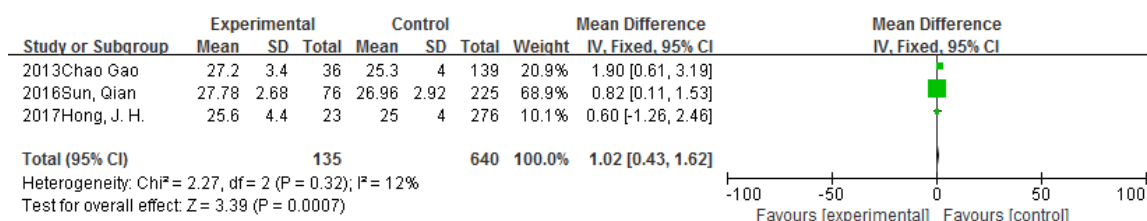

## 1.58 MMSE of G2385R

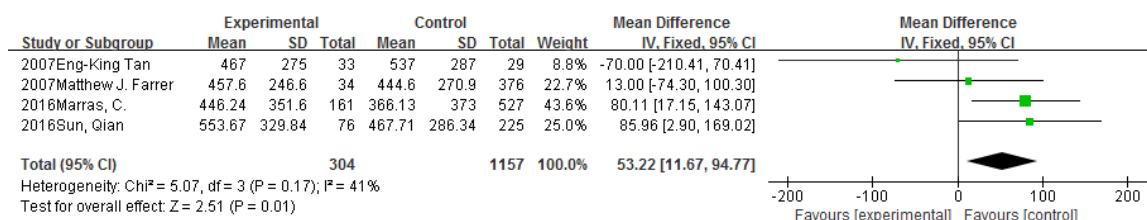

## 1.59 LEDD of G2385R

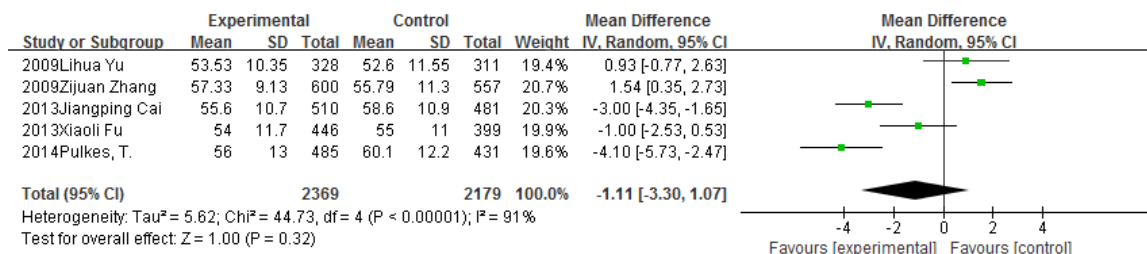

## 1.60 Age at onset of R1628P



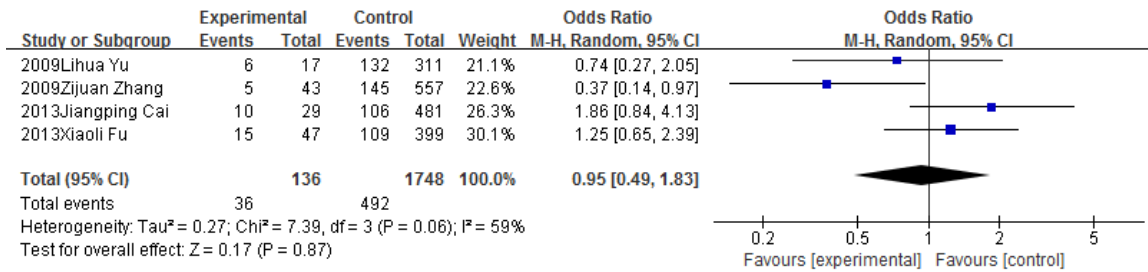

### 1.61 EOPD of R1628P

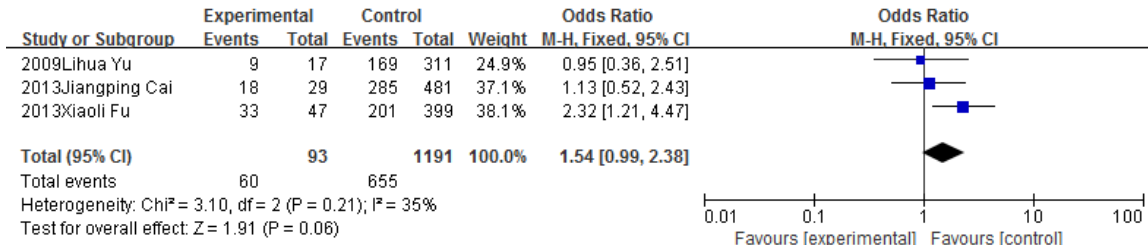

### 1.62 Gender-male of R1628P

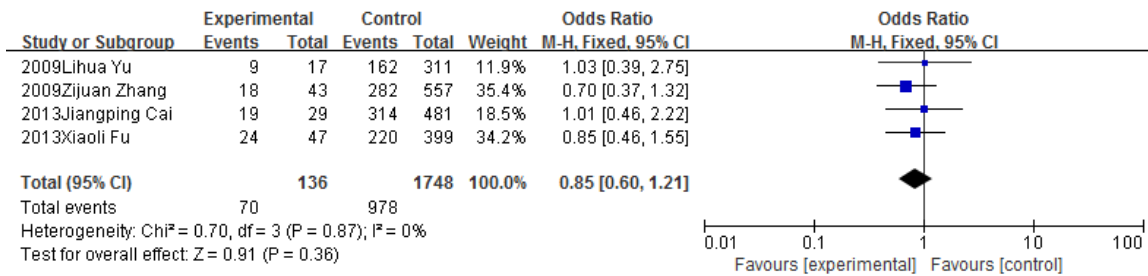

### 1.63 FS-Resting tremor of R1628P

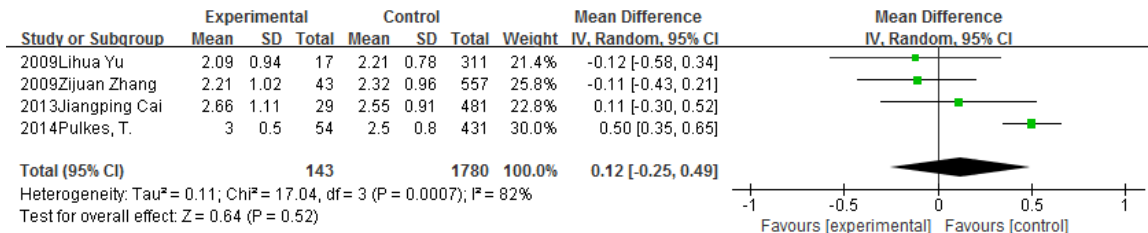

### 1.64 H-Y of R1628P

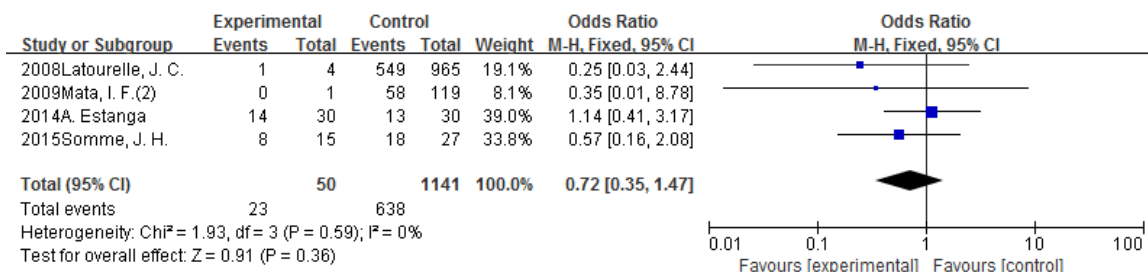

### 1.65 Gender-male of R1441G

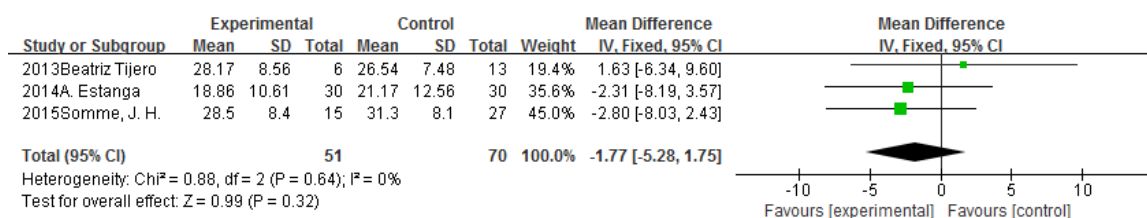

## 1.66 UPDRSIII of R1441G

Supplementary Figure 1. Forest plots of the association between specific variants in *LRKK2* and PD clinical features. 1.1-1.39 reflected the pooled results of G2019S-related clinical features. 1.40-1.59 reflected the pooled results of G2385R-related clinical features. 1.60-1.64 represented the pooled results of R1628P-related clinical features. 1.65-1.66 represented the pooled results of R1441G-related clinical features.
